# Supplementary material
Source: PubMed Central journal article supplement (PMC4703270)
Supplement: SD9.pdf [file SD9.pdf]

|         | signal peptide                                                                                                                                                                                        | mucin                                       |
|---------|-------------------------------------------------------------------------------------------------------------------------------------------------------------------------------------------------------|---------------------------------------------|
| KKOV_G  | MLLSDGVWKFVAIVLCTILCTVA-----122-----                                                                                                                                                                  | RAVSRVRLARVRSGERN                           |
| LPHV_G  | METYHGSRYTATSCLFFVIMLVVAITA----100-----                                                                                                                                                               | RAERLRTARLDVNGNR                            |
| YOGV_G  | MSLNNGVRTYVGFVALFLILFGKLTVADG--72-----                                                                                                                                                                | ETIDRLVVRQLQSGSSK                           |
| IKV_G   | MRHTSMFNKLVEYVVGCVILCYFADITWCG--254-- <u>RKLELVQNSSTEADISNSSLPATAPSTHLTSAPETSKPSDAVTAVTQNTNATLE</u>                                                                                                   |                                             |
| KTRV_G  | MRHTDMFNGLRHVIGCVILCYIIDITRCS--283-- <u>RKLELVQNSSTEADISNSSLPATAPSTHLTSAPETSKPSDAVTAVTQNTNATLE</u>                                                                                                    | TTFL                                        |
| GOSV_G  | MYNSKYVCIIVFLSSHCFGLLAG-----616-----                                                                                                                                                                  | PAANANLGRKLLSTEEVTTNGTSPETSET               |
| ERVV_G  | MVTRWVVAALVIKWCLLMKVTLV-----52-----                                                                                                                                                                   |                                             |
| TFAV_G  | METKWVVAALVMQYLQLLSLTVS-----45-----                                                                                                                                                                   |                                             |
| CCHFV_G | MPISIMHISLMCAVLCLQLYGLGGTHG----221-----                                                                                                                                                               | TPGLMTSPTQIVHPQSA <sup>T</sup> PITVQDTHPSPT |
|         |                                                                                                                                                                                                       |                                             |
| KKOV_G  | <u>L</u> VISREAGGDLOQAREALEEAVMMEIDNLALEQMEETTYRSVQRE <u>R</u> LAL <u>P</u> QCGKFAYEEHEGEVMLVGKLSRYTRFERVDVNDLDSLAKFS                                                                                 |                                             |
| LPHV_G  | VVLKREISGNLQAKEQLEEAVLNMEIDSLDLQLEEEESPYRSMQRT <u>R</u> LML <u>P</u> KLESFAYNEEQEEDVMVTGKLSRFRFRERINIDKLESITVFO                                                                                       |                                             |
| YOGV_G  | <u>L</u> TLSRFRVRRDLTMEKKEPETAAGLELDEISLEKLKQESLYRSVTKVTFALRPNARFAYEAHGSEVMI <u>T</u> GKLNRFTRFRVNIIDRRTFMFESFO                                                                                       |                                             |
| IKV_G   | P <sup>T</sup> ISATAAPSKLES <sup>D</sup> KAITP <sup>T</sup> SVSRORRKINDWTRMLHITVHSPKDDSDISTAE <sup>L</sup> SVRTVTHSIPAQYSDQNRHENTRFFSLDLDSDVDYKST                                                     |                                             |
| KTRV_G  | SMTANGTLNITIT-KPVITP <sup>T</sup> SI <u>S</u> RNKR <u>R</u> AEDW <u>R</u> KLLHITVHSPDDSDISTAEQT <sup>V</sup> TTITNLTS <sup>PAQYSE</sup> QK <sup>HENTR</sup> FFSM <sup>D</sup> LDS <sup>D</sup> SDYKST |                                             |
| GOSV_G  | TIKPITKTTTLAKITTASP <u>R</u> VKR <u>K</u> KQKNAILEALFMTIRKPVGETELSETOMEI <u>V</u> KAEDLTAPAQYSEAKHIENS <sup>R</sup> FYMMNLDS <sup>E</sup> TWVDVKV                                                     |                                             |
| ERVV_G  | ----- <u>N</u> CTQCE <u>L</u> ARSVVNYTSGEWA <sup>P</sup> TLEALY <sup>T</sup> SGSP- <u>C</u> DKLNK <u>S</u> CKLEVGKTHGLSP-----YVKHLY                                                                   |                                             |
| TFAV_G  | ----- <u>N</u> QSVKSDQ-I <sup>SYAAN</sup> LDSTLEALFTK <sup>D</sup> TS- <u>N</u> K-NLS <u>W</u> CRLEVT <sup>D</sup> THGLTP-----YVKHLY                                                                  |                                             |
| CCHFV_G | <u>N</u> RSKRNLKMEITL <u>S</u> LGKLYY <u>K</u> ILRLQLLLEEDTEGLEW <u>K</u> RNLGLL <u>C</u> DDTFFQKRIE <sup>EFFIT</sup> GEGH <u>F</u> NEVLFQRTPGTLSTESTPAG                                              |                                             |
|         |                                                                                                                                                                                                       |                                             |
| KKOV_G  | NHSSVSLTITCTH-----FGHY-----NATTKGTTTSVHTCCDENTCCKGIEEHVQTEK <sup>V</sup> ANYDNIKLNLLELPVIIAYFTRHFGFTYSN                                                                                               |                                             |
| LPHV_G  | NLTNRSVLTLCTY-----FGHY-----NKT <sup>L</sup> KGTVS <sup>I</sup> H <sup>H</sup> CKDIETCCKGLTEHVS <sup>I</sup> DR <sup>I</sup> TNYDNIKLINIMELPVIIAYFTRHFGFTYKN                                           |                                             |
| YOGV_G  | NLTNSNMIALCTY-----FGLY-----NSTTKGTRAIK <sup>G</sup> ATCNMDEMCRAE <sup>TE</sup> VANVGHLDHYENIKVFDKPELPVIVAYLTRCMGFTYKD                                                                                 |                                             |
| IKV_G   | NLPQQRVSIICAKGALECKLGEVYPHVEIKDLWP <sup>G</sup> KTS <sup>EN</sup> LTA <sup>CE</sup> FANTCPGTPIDVKLPNVN-YDNIKVMSTPDM <sup>P</sup> VIIINYLTHYGF <sup>L</sup> DYN                                        |                                             |
| KTRV_G  | SLPGOKVAIIICAKGVLEKLGDIYPHVEIKKLP <sup>D</sup> KTS <sup>EN</sup> LTS <sup>CE</sup> FVKTCPGKPIDIKLPNVN-FENIKVMSTPDM <sup>P</sup> VIIINYLTHYGF <sup>L</sup> DYN                                         |                                             |
| GOSV_G  | ALKRYKVAVICAKGVLEGEAGHLYP--VMNSSELWLGONLTA <sup>CK</sup> FDOTCPGKIEDVKLSNVN-YENIKVSTPDM <sup>P</sup> VIIISYLTHYGYW <sup>P</sup> SH                                                                    |                                             |
| ERVV_G  | NLSYDGYNALC-----ETKKNYGF-----VWK <sup>K</sup> FTE <sup>V</sup> TGPERVLLRDVCC <sup>N</sup> VYDGI <sup>T</sup> KDGYLIHFLGGRRVHFTD--                                                                     |                                             |
| TFAV_G  | NLSNSKYNTFC-----QSKKNFGF-----TKKEKFTEDVTGPERMLLKDIOCANVIYDGVTKDGYLLHVLGGRRVVF--YS                                                                                                                     |                                             |
| CCHFV_G | LPTAEPFKSYFAKGLSIDSGYYSAR <u>C</u> YSGTNSNGLQLINITRHS <sup>T</sup> RIVDTPG <sup>E</sup> KITNLK <sup>T</sup> INCIN-LKASIFK <sup>E</sup> HREVEINVL <sup>L</sup> POAVNLSN                                |                                             |
|         |                                                                                                                                                                                                       |                                             |
| KKOV_G  | LVMHEQIENCLFFHPLNPVACM--SWS-SRSYP-VVHEVIERKFLKSDSSITL---CGLKKG <sup>N</sup> PT <sup>CM</sup> KGTWFAEKHRLTIDLGDPEVAGRRLIL                                                                              |                                             |
| LPHV_G  | LVIHEQIENCLFFYPQNPVACMENNWG-GRSHP-VVHLVIERKYLKADSSITL---CGLKKG <sup>N</sup> PT <sup>SL</sup> KGTWFAEKT <sup>V</sup> IIDLGPQTAGRRLIL                                                                   |                                             |
| YOGV_G  | LVLQEQLENCLEFFHPYNPKVCMETNWHN-RVYP-ITHFVIERKFLKPSSSLTL---CGLKKG <sup>M</sup> PGKIKGTWYFSKTRVRIHLGDPETAGRRLIL                                                                                          |                                             |
| IKV_G   | MMFHFENRCGLYLIPIRSNYCWFLRSEK-VFSP-VSTIVIERKFLTAESKMLM---CAIKRVGHGEVKG <sup>T</sup> WKYVROPIRIWFKDDRTMGLRRLIL                                                                                          |                                             |
| KTRV_G  | LMYHFENRCGLYLIPIRSNYCWFLRSEK-VFSP-VSTIVIERKFLTAESKMLM---CAIKKSGHGEIKGTW <sup>K</sup> YTKQPIRIWFSDDRTMGLRRLIL                                                                                          |                                             |
| GOSV_G  | LIYTFENRCGLYLFPYNHECWFINSKN-TFSP-VSTFVIERKFLNENSYLDT---CAIKKEGQGNKGTWR <sup>F</sup> GKHPRIWENEDRTMGLRRLIL                                                                                             |                                             |
| ERVV_G  | CKYAVITKNC-KIESSKDGVPVLAGYGNWT--TATYSLFLONKYANEA--CKIKFPC-LNKGKALG-NGGFE-LKG <sup>F</sup> YFTGLTRPETS <sup>G</sup> -RRLIL                                                                             |                                             |
| TFAV_G  | CRYTIIKNC-RIRASHDAPVPLPGYGNWT--TAMYSVFLHRSAAET--CKIYFPC-LNKGKPLG-NGGFE- <sup>I</sup> KGFV <sup>T</sup> GLTKPEGT <sup>G</sup> -RRLIL                                                                   |                                             |
| CCHFV_G | CHVIKSHVCDYSLDIDGAVRLPHIYHEGVFIPGTYKIVIDDK-NKLNDRCTLF <sup>T</sup> DCV <sup>L</sup> -KGREVR-KGQS-VLRCYKTEIRIKASTGSRRLIL                                                                               |                                             |
|         | : . * : . . . . . : * : : * : : * * * *                                                                                                                                                               |                                             |

SUPPLEMENTAL FIGURE 1. The deduced amino acid sequences of the gp38 domain of nine nairoviruses aligned in ClustalX and adjusted visually. Cysteine residues are shaded in black and other conserved residues are shaded in gray. Predicted N-glycosylation sites are underlined. Predicted proteolytic cleavage sites that may define the N-terminus gp38 (furin-like or SKI-1) and N-terminus of Gn (R[R/K]LL) are shaded in black and underlined.

```

KKOV_Gn -----GLEKRRKPLKRQDIRCHSGSHLVKVKYAAATNEYKSFDPDAKVGFCNDSMITNLPIGHEFGCYRVGVSVSTHIQCKPYHNAVDGEKDCN
LPHV_Gn AGRRKLLAIERRRRLPGREDIRCHSGSHLVKIDKYAPTNEFQSFNPAKIGFCNDSITHLPLGQEFQCYRVGVSVKTHVQCKPYHHAFFDGEKTCN
YOGV_Gn -----AVERRRRLPSRVNIRCFQFGSHLIKMDKYAIVNEHRSLPNARSGFCNNSIFTNLPGLGSEFGCYRVGSEKTHIQCKPHHHAYDGEQTCN
IKV_Gn -----SVQVKQQTQKVTNTYCHSRSHLPIEQHQLTKVRSVPRPRIAICNDSVVTEPLGQEHGQCYSVGKVKVHYQCTPEEHAVQVPNBCN
KTRV_Gn -----SVQVRQQKSKVNTYCHSRSHLPIEQHQLSTTSRIVPRPRIAICNDSVITELPLGQEHGQCYSVGKIKVHYQCTPEEHAVQVPNBCN
GOSV_Gn -----SVKNSIPKQKVNTWCHSRSHLPIEKHELHTRKIVRPRVAFICNDSVVTNLPGLVEHGQCYSVGKMKVHYQCTPKTHALNVPNBCN
ERVV_Gn -----STGDSEPEDDCGTHSHMKQITNHHLITDFDKDGPDDVVSICNGTHFFHGRMPNNLCYSIRSIKVSHHCGHHKT-----KCT
TFAV_Gn -----TAADPEPEDDCGSASHLKQITNHHLVTDFFDKDGPDDVVSICNGSTFFHGRMPDGLGCHSIRSIKVSHHCGHHST-----KCT
CCHFV_Gn -----SEEPSDDICSRQTQLRLETAEIHGDNYGGPKITICNGSTIVDQRLGSELGCYTINRVRSFKLCENSATGK-----NCE
      . . *   : : :   *   : * : . . . :   * : :   *
KKOV_Gn VTSTED-CEQDMLCAEVKLNQGQIVTARTQLGQEVQLKHCLEKCHFGFKKVNDELVEYFTCPDGKQHRHLSNAIDANCPQFKHLGKYALYACRATH
LPHV_Gn VSSDGD-CREGEGLCAAVKLNQGQITARTHLGQEVQVKHCLEKCFQSFTRVNDLEVSFTCPDGQQRRLHNSNAVDTCNCPFNKLGKYALYVCRATH
YOGV_Gn ITSPEN-CEDNHLCAEVTLNQGQIVTARAHDGRVELKHCLEKCSFSFKMVSDEILFTCPSGEQHRFHSNIDACCPFRDRLGKYALYVCRATH
IKV_Gn ITVSEN-CAAGEVCFVLNLNQGQGHVSSAVVGHSPVTKRCLNSCMFKFKKTSSELDVLFVCPGGKQHRVQTNVVDIQCMPHEMLGRAALYICRATY
KTRV_Gn ITTISDN-CPDNEVCFPLISLNQGQGHVSSAVVGHSPVTKRCLNSCMFKFKKTSSELDVLFVCPGGKQHRVQTNVVDIQCMPHEMLGKAALYICRATY
GOSV_Gn ITTEPK-CETGNVCFVSVLNQGQMVSAVAGRSNQVKNCLNKCTFQFPKTLDDLVDLFTCPGGKQHRVQTNVVDIQCMPWHNLLGRPALYICRATY
ERVV_Gn IEPELQCSHGK-CISIRMSNKGIVRLSRG-SSSTETIKCSTECCLIPPLDG-EGDIIVDGPGGTQHFLQRNIDLDLCPNYPYFQEFMLYICRASH
TFAV_Gn VEPDLKACSHGK-CILIRMSNRGMVKLTRG-TTVETIRCTECMLPPLDG-EGDIIVDGPGGTQHFLQRNIDLDLCPNYPYFQEFMLYICRASH
CCHFV_Gn IDSVPVKRQGY-CLRITQEGRGHVKLSRG-SEVVLDACDTSCEIMIPKG-TGDIIVDGGGQGHFLKDNLDLGLPKIPLLGKMAIYICRMSN
      :   *   *   : . : * :   *   *   :   : . * . * * . : * * * *   :   : * * * :
KKOV_Gn RPIMLYTVIAWLTVGMALSIITLQVLSLLIRTYCYFVICVAKLDRGKGCPCSCNDMVSSEEWQRHQ-NCKRGKCPYCGTKGSEIDLKPHANV
LPHV_Gn RPLVLYTTFIWFVGTIVLATSLOMISVTKLYLVLAARLTKGKVCDCGSESVLSTEWEQRHQ-CKKGRKCPYCGVKGSGNDVQKHVIN
YOGV_Gn RPTLLYIVLWLVAGLIVTTIIQLAVLCKMVCYLVKIKLKSCLDRGRGTCTFCNESVCSTEWEQRHEG-CRRGKCPYCGKGGVDIKRHASV
IKV_Gn RPKALYFTLFWLTFGYVCFCLVMEVLKIAVLVTVCKVINFCMEKADKTRGYCEHCKLWVNSYQEWWDHKS-CCACKPCFCGLSFARREFFRHAEE
KTRV_Gn RPKALYFTLFWITFGYVCFCLVMEVVKISVLIACKLINFFMEKADKTRGYCEHCKLWVNSYQEWWDHKS-CCACKPCFCGFNFARSEFPKHAKD
GOSV_Gn RPTALYFTLFWITFGYVCFVAMEILKQVIMLSCKLICICEKADKTRGYCEHCKLWVNSYQEWWDHRE-CKVSRCPFCEKHPAKSEFSQHAHV
ERVV_Gn RPKTTIGFPLWMSVGYIILSACCSFTLLLRLLCKGVELCKTRFTSTQEVCEVCKQOISGNLSKQLHEANCKNGLCPYCSNRLPESSLYKHAHV
TFAV_Gn RPKTTIAFFAWLSVGYILLSTVCSISLWSLKMCKGIELCKSKLPHNSGECKVCRQHYSSSELGQQLHEANCKNGLCPYCSNRLPESSLYKHAHV
CCHFV_Gn HPKTTMAFLWFESEGYVITCILCKAIFYLLIIVGTLGKRLKQYRELKQCTCICETTPVNAIDAEMHDLNCSYINCPYCASRLTSDGLARHVIQ
      : *   :   *   *   :   :   :   *   *   * * * * * * * * * * * * * * * * * * * * * * * * * * * * * * * * * * * *
KKOV_Gn CLQKETVLEHDANVLNIRRTPRALRLGCLVNSLQGGKPTRLTFWVLLCLFCLLIRPVSS
LPHV_Gn CLQRETVLEHDLNVLNIRRTPRYALRLGCLNALQGRPIRLIWLVLVLLFLVFLIKPVRS
YOGV_Gn CLQRETTLEHDKGIEIRRTPRWALKIGCLLNGMQGKPARGAWLVVLVMLIILVKPVSG
IKV_Gn CTSRSVKLENINAVLAVRRTPRVLIWIAVALTRYFKTVCRLSWATVLLVMCLLIISPVSQ
KTRV_Gn CTSRAVKIENINAVLAVRRTPRVLIWIAVALTRYFKTVCRLSWATVLLVMCLLIISPVSQ
GOSV_Gn CTCKENKLETTKAVLTVRRTPKLLLWSAVILTKYFRIICKISWGTILLALCLLIISPVRG
ERVV_Gn CPRKKTVEAIREHENYNSWPWLFVFIQVSEYSGTLIKRSVNIIVLLSLLVALSPVYG
TFAV_Gn CPRKKTVEDTIREHDDFNSTPWFVFIQVSEYSGTLIKRATWMLLALLLVSLSPVYG
CCHFV_Gn CPRKKEVEETEYLNLERIPWVVRKLLQVSESTGVALKRSSWLIVLLVLFVSLSPVQS
      *   :   :   :   *   :   :   :   :   :   :   :   :   :   :   :   :   :   :   :   :   :   :   :   :

```

SUPPLEMENTAL FIGURE 2. ClustalX alignment of the deduced amino acid sequences of the Gn proteins of nine nairoviruses. Conserved cysteine residues are shaded in black and two predicted transmembrane domains are shaded in gray. Predicted N-glycosylation sites are underlined. Identical (\*), strongly conserved (:) and weakly conserved (.) residues as assigned in the Gronnet Pam250 matrix are indicated below the alignment.



```

KKOV_L  PGDGTCEFFSSVSKYIFN--TTEMWKTVKSTCANYARAHWQEVMEMDRRYQSPETYIEDLMNDQYWGGSEAEILSKALNMTIH
LPHV_L  PGDGTCEFFSSVSKYIFN--TTELWQTVKSTCANYARAHWKEVMEMDRQYAEADAYISDLMRDQYWGGSEAEILSKALNMTIY
YOGV_L  PGDGTCEFFSSVSKYIFN--TTEQWRVAVKTCANYARANWDTVMEIDRHYQNADHYVNDLMRDQYWGGSEAEILNKALNMTVH
IKV_L   LPDGRCEFFRAMAKFMFN--SSDEWLIVKRACIEYSRQHWNRFLVYTRLYPSSADYERDIMRDDYWGGSLEAEVLSDLYNLTIH
KTRV_L  QPDGRCEFFRAMAKFMFN--SSDEWLIVKRACIEYARQHWNKFLVFTRLYQTPADYERDIMRDDYWGGSLEAEVLSDLYNLTIH
GOSV_L  VPDGKCEFFRAMAKFMFN--SDEEWLLVKRACVEFARQHWDRFLEFTRNYQRANDYERDIMRDDYWGGSLESDILSELYNVTIH
ERVV_L  VGDGNCFYRALSRLHSESRTSNEHLYYRLLIPDAVDKYFDIEPEAIGLGLNKQEYVSKAILDGEWAGSLEASMLSKFLDITII
TFAV_L  VGDGNCFYRALSRLHSDKTSDEHLYYRLLIPDAAQRYFDTEQEAVGLGLTKEEYASRAILDGEWAGSLEASMLSKFLDITII
CCHFV_L PGDGNCFYHSIAELTMPNKTDHSYHYIKRLTESAARKYYQEEPEARLVGLSLEDYLRMLSDNEWGSTLEASMLAKEMGITII
      ** *: : : . : . : . : . * : * * . : : * . : * :
      *

KKOV_L  IWVSGDGVVWVNARRWGADQIHASLNLIHVHGGHFNLL
LPHV_L  IWVSGDGVVWVNARRWGGEPIQTSNLNLIHVHGGHFNLL
YOGV_L  IWVSDDGVVWQNARRWGREAVAASLNLVHVGGHFNLL
IKV_L   FWVTDDHQWIHHVQRWKNNAHMSINLLFNQN-HFDLL
KTRV_L  FWVTDDHQWIHHVQRWKNNAHMSINLLFNQN-HFDLL
GOSV_L  FWVTDDHLWIHHVQRWGLEAPHISINLLFNQN-HFDLL
ERVV_L  IWIVDDSGTIIISANRYGEGRPSQAYNLCMVGNHFDL
TFAV_L  IWIIDGSGTITSAQRYGNKPSKAYNLCIGNTHFDL
CCHFV_L IWTVAAASDEVEAGIKFGDGDVFTAVNLLHSGQTHFDAL
      :*      :      : :      : **      ** : *

```

SUPPLEMENTAL FIGURE 4. ClustalX alignment of the deduced amino acid sequences of the OTU-like protease domain in the L proteins of nine nairoviruses. Identical (\*), strongly conserved (:) and weakly conserved (.) residues as assigned in the Gronnet Pam250 matrix are indicated below the alignment. Fully conserved residues that may be critical in the active site fold are shaded in gray.
